# Supplementary material for: PhI(OAc)2–BF3–OEt2mediated domino imine activation, intramolecular C–C bond formation and β-elimination: new approach for the synthesis of fluorenones, xanthones and phenanthridines
Source: Royal Society of Chemistry journal article supplement (doi:10.1039/c4ra06159d), 2014-08-19

## Supplementary Material

# PhI(OAc)<sub>2</sub>-BF<sub>3</sub>-OEt<sub>2</sub> Mediated Domino Imine Activation, Intramolecular C-C Bond Formation and β-Elimination: New Approach for the synthesis of Fluorenones, Xanthenes and Phenanthridines †

Satinath Sarkar<sup>a</sup> and Narender Tadigoppula<sup>\*a</sup>

<sup>a</sup>Medicinal and Process Chemistry Division, CSIR-Central Drug Research Institute, Chattar Manzil Palace, Lucknow-226-031, India. Fax: +91-522-2623405; Tel: +91-522-22612411; E-mail: t\_narendra@cdri.res.in; tnarender@rediffmail.com

### Contents for supporting information:

#### General information

Structures of Aldimines (2, 12-19, 31-33 and 40-42)

General procedure for synthesis of biaryl-2-carbaldehydes

Spectroscopic data of biaryl-2-carbaldehydes

General procedure for synthesis of 2-aryloxybenzaldehydes

Spectroscopic data of 2-aryloxybenzaldehydes

General procedure for synthesis of biaryl-2-amines

Spectroscopic data of biaryl-2-amines

General procedure for synthesis of fluorenones and xanthenes

Spectroscopic data of fluorenones and xanthenes

General procedure for synthesis of phenanthridines

Spectroscopic data of phenanthridines

Copies of <sup>1</sup>H-NMR and <sup>13</sup>C-NMR

#### General information

All reagents were purchased from commercial suppliers and used without further purification. IR spectra of the compounds were recorded on Perkin-Elmer AC-1 spectrometer. <sup>1</sup>H NMR spectra were run on Bruker Advance DPX 300 MHz spectrometer in CDCl<sub>3</sub> and TMS was used as internal standard. ESI mass spectra were recorded on JEOL SX 102/DA-6000. Silica gel 60-120 and 230-400 mesh was used as stationary phase to isolate the compounds. Melting points were uncorrected and were recorded on a Buchi B-54 melting point apparatus. Dichloromethane (DCM) and 1,2-dichloroethane (DCE) was distilled over calcium hydride. Aldimines (2, 12-19, 29, 32, 37-39 and 46-48) were prepared from condensation of the corresponding aldehydes with amines according to the literature method.<sup>1</sup>

Structures of Aldimines (2, 12-19, 29, 32, 37-39 and 46-48)

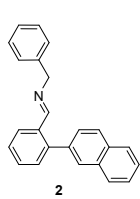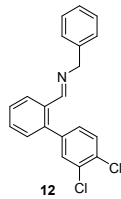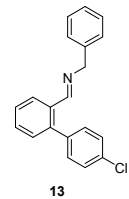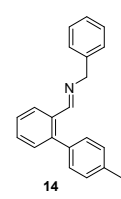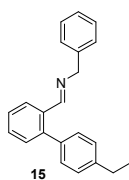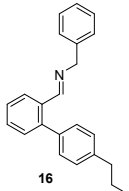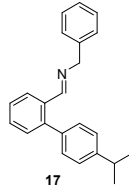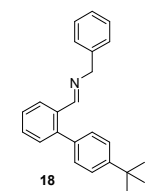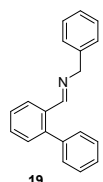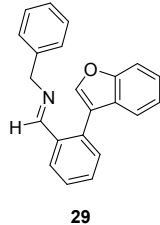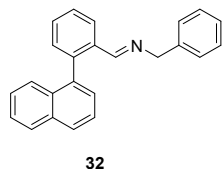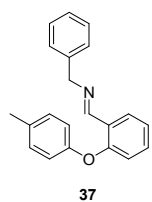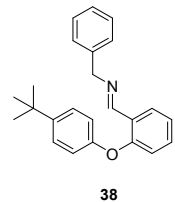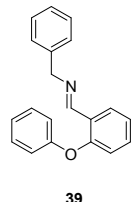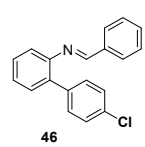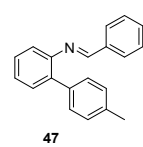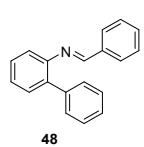

## General procedure (I) for synthesis of biaryl-2-carbaldehydes

5 mmol of 2-bromobenzaldehyde, 6 mmol of arylboronic acid and 0.5 mmol of Pd(PPh<sub>3</sub>)<sub>4</sub> were taken in a round bottom flask. 10 ml of DMF was added in the reaction mixture and stirred for 2 min. 10 ml of 2(M) Na<sub>2</sub>CO<sub>3</sub> solution was then added and then refluxed for 4-8 h at 80 °C. The reaction mixture was extracted with ethyl acetate (2 x 10 mL). The combined ethyl acetate layers were dried over anhydrous Na<sub>2</sub>SO<sub>4</sub> and concentrated under vacuum to yield the crude product, which was purified by column chromatography on silica gel (60-120 mesh) using ethyl acetate/hexane as eluent.

### Spectroscopic data of biaryl-2-carbaldehydes

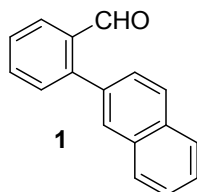

2-(naphthalen-2-yl)benzaldehyde (**1**): Following the general procedure (I), **1** was prepared from naphthalen-2-ylboronic acid and 2-bromo benzaldehyde and purified by column chromatography on silica gel (60-120 mesh) using (hexane : EtOAc = 90 : 10). Yellow oil 373 mg (59% yield); IR (KBr):  $\nu_{\max}$  3058, 3020, 2860, 1695 cm<sup>-1</sup>; <sup>1</sup>H-NMR (300 MHz, CDCl<sub>3</sub>):  $\delta$  10.08 (s, 1H), 8.11 (d, *J* = 7.7 Hz, 1H), 7.98-7.85 (m, 4H), 7.72-7.60 (m, 1H), 7.58-7.56 (m, 5H); <sup>13</sup>C-NMR (75 MHz, CDCl<sub>3</sub>):  $\delta$  192.4 (C), 145.9 (C), 135.2 (C), 134.0 (C), 133.6 (CH), 133.0 (C), 132.8 (C), 131.0 (CH), 129.5 (CH), 128.2 (CH), 128.2 (CH), 127.9 (CH), 127.8 (CH), 127.8 (CH), 127.7 (CH), 126.9 (CH), 126.7 (CH); MS (ESI): *m/z* = 233.1 (M+H)<sup>+</sup>. The compound was previously reported by Larock et al.<sup>2</sup>

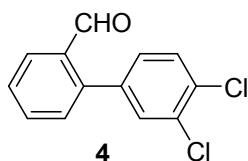

3,4'-dichlorobiphenyl-2-carbaldehyde (**4**): Following the general procedure (I), **4** was prepared from 3,4-dichlorophenylboronic acid and 2-bromo benzaldehyde and purified by column chromatography on silica gel (60-120 mesh) using (hexane : EtOAc = 80 : 20). Yellow solid 412 mg (61% yield); m.p. 136-138 °C; IR (KBr): 3035, 2850, 1692, 777, 766 cm<sup>-1</sup>; <sup>1</sup>H-NMR (300 MHz, CDCl<sub>3</sub>):  $\delta$  10.15 (s, 1H), 7.94 (dd, *J* = 7.3, 1.4 Hz, 1H), 7.77 (dd, *J* = 7.5, 1.6 Hz, 1H), 7.72-7.63 (m, 3H), 7.39 (d, *J* = 7.5 Hz, 1H), 7.31 (dd, *J* = 7.4, 1.3 Hz, 1H); <sup>13</sup>C-NMR (75 MHz, CDCl<sub>3</sub>):  $\delta$  193.2 (C), 139.3 (C), 137.4 (C), 137.4 (C), 135.0 (CH), 134.2 (C), 131.9 (CH), 128.8 (CH), 128.7 (CH), 128.6 (CH), 127.0 (CH), 126.3 (CH), 126.1 (CH); MS (ESI): *m/z* = 251.1 (M+H)<sup>+</sup>.

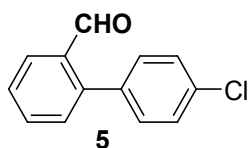

4'-chlorobiphenyl-2-carbaldehyde (**5**): Following the general procedure (I), **5** was prepared from 4-chlorophenylboronic acid and 2-bromo benzaldehyde and purified by column chromatography on silica gel (60-120 mesh) using (hexane : EtOAc = 90 : 10). Pale yellow oil<sup>3</sup> 383 mg (67% yield). Spectroscopic data was identical with that previously reported.<sup>3</sup>

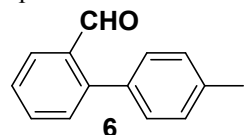

4'-methylbiphenyl-2-carbaldehyde (**6**): Following the general procedure (I), **6** was prepared from 4-methylphenylboronic acid and 2-bromo benzaldehyde and purified by column chromatography on silica gel (60-120 mesh) using (hexane : EtOAc = 90 : 10). Pale yellow oil<sup>4</sup> 382 mg (72% yield). Spectroscopic data was identical with that previously reported.<sup>4</sup>

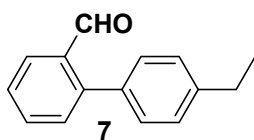

4'-ethylbiphenyl-2-carbaldehyde (**7**): Following the general procedure (**I**), **7** was prepared from 4-ethylphenylboronic acid and 2-bromo benzaldehyde and purified by column chromatography on silica gel (60-120 mesh) using (hexane : EtOAc = 90 : 10). Pale yellow oil 407 mg (68% yield); IR (Neat): 3020, 2965, 2930, 2845, 1698  $\text{cm}^{-1}$ ;  $^1\text{H-NMR}$  (300 MHz,  $\text{CDCl}_3$ ):  $\delta$  10.03 (s, 1H), 8.04 (d,  $J = 6.9$  Hz, 1H), 7.68-7.62 (m, 1H), 7.52-7.46 (m, 2H), 7.33 (brs, 4H), 2.74 (q,  $J = 7.6$  Hz, 2H), 1.33 (t,  $J = 7.6$  Hz, 3H);  $^{13}\text{C-NMR}$  (75 MHz,  $\text{CDCl}_3$ ):  $\delta$  192.6 (C), 146.0 (C), 135.0 (C), 133.8 (C), 133.5 (CH), 130.8 (CH), 130.1 (2CH), 127.9 (2CH), 127.5 (CH), 28.6 ( $\text{CH}_2$ ), 15.5 ( $\text{CH}_3$ ); MS (ESI):  $m/z$  211.1 ( $\text{M}+\text{H}^+$ ).

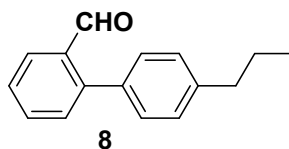

4'-propylbiphenyl-2-carbaldehyde (**8**): Following the general procedure (**I**), **8** was prepared from 4-propylphenylboronic acid and 2-bromo benzaldehyde and purified by column chromatography on silica gel (60-120 mesh) using (hexane : EtOAc = 90 : 10). Pale yellow oil 450 mg (74% yield); IR (Neat): 3032, 2945, 2862, 1696  $\text{cm}^{-1}$ ; MS (ESI):  $m/z$  225.1 ( $\text{M}+\text{H}^+$ );  $^1\text{H}$ - and  $^{13}\text{C}$ -NMR data was identical with that previously reported.<sup>5</sup>

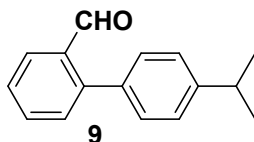

4'-isopropylbiphenyl-2-carbaldehyde (**9**): Following the general procedure (**I**), **9** was prepared from 4-isopropylphenylboronic acid and 2-bromo benzaldehyde and purified by column chromatography on silica gel (60-120 mesh) using (hexane : EtOAc = 90 : 10). Pale yellow oil<sup>6</sup> 405 mg (68% yield). Spectroscopic data was identical with that previously reported.<sup>6</sup>

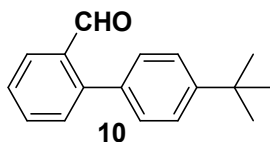

4'-tert-butylbiphenyl-2-carbaldehyde (**10**): Following the general procedure (**I**), **10** was prepared from 4-tertbutylphenylboronic acid and 2-bromo benzaldehyde and purified by column chromatography on silica gel (60-120 mesh) using (hexane : EtOAc = 90 : 10). Pale yellow oil<sup>7</sup> 445 mg (69% yield). Spectroscopic data was identical with that previously reported.<sup>7</sup>

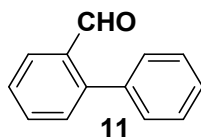

Biphenyl-2-carbaldehyde (**11**): Following the general procedure (**I**), **11** was prepared from phenylboronic acid and 2-bromo benzaldehyde and purified by column chromatography on silica gel (60-120 mesh) using (hexane : EtOAc = 90 : 10). Pale yellow oil<sup>8</sup> 344 mg (69% yield). Spectroscopic data was identical with that previously reported.<sup>9</sup>

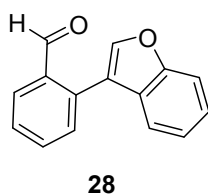

2-(benzofuran-3-yl)benzaldehyde (**28**): Following the general procedure (I), **28** was prepared from benzofuran-3-ylboronic acid and 2-bromo benzaldehyde and purified by column chromatography on silica gel (60-120 mesh) using (hexane : EtOAc = 85 : 15). Pale yellow oil<sup>2</sup> 410 mg (68% yield). Spectroscopic data was identical with that previously reported.<sup>2</sup>

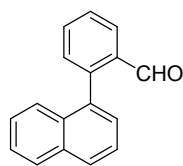

**31**

2-(naphthalen-1-yl)benzaldehyde (**31**): Following the general procedure (I), **31** was prepared from naphthalen-1-ylboronic acid and 2-bromo benzaldehyde and purified by column chromatography on silica gel (60-120 mesh) using (hexane : EtOAc = 90 : 10). White solid<sup>10</sup> 362 mg (58% yield); m.p.: 88-90°C (lit<sup>10</sup> m.p. 87-88°C). Spectroscopic data was identical with that previously reported.<sup>10</sup>

### General procedure (II) for synthesis of the 2-(aryloxy)benzaldehydes<sup>11</sup>

To a solution of DMA (10 mL) containing 2-fluorobenzaldehyde (5.0 mmol) and hydroxy benzene derivative (5.0 mmol), was added K<sub>2</sub>CO<sub>3</sub> (5.0 mmol) and the reaction mixture was stirred for 2 h at 170 °C under an Argon atmosphere. It was then cooled to room temperature and after usual workup and concentration, crude mixture was purified by column chromatography on silica gel (60-120 mesh) using ethyl acetate/hexane as eluent.

### Spectroscopic data of 2-(aryloxy)benzaldehydes

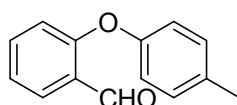

**34**

2-(p-tolyloxy)benzaldehyde (**34**): Following the general procedure (II), **34** was prepared from 4-methylphenol and 2-fluorobenzaldehyde and purified by column chromatography on silica gel (60-120 mesh) using (hexane : EtOAc = 90 : 10). Pale yellow oil<sup>12</sup> 512 mg (60% yield). Spectroscopic data was identical with that previously reported.<sup>12</sup>

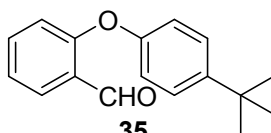

**35**

2-(4-tert-butylphenoxy)benzaldehyde (**35**): Following the general procedure (II), **35** was prepared from 4-tertbutylphenol and 2-fluorobenzaldehyde and purified by column chromatography on silica gel (60-120 mesh) using (hexane : EtOAc = 90 : 10). Pale yellow oil<sup>2</sup> 650 mg (65% yield). Spectroscopic data was identical with that previously reported.<sup>2</sup>

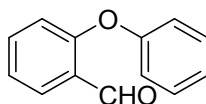

**36**

2-phenoxybenzaldehyde (**36**): Following the general procedure (II), **36** was prepared from phenol and 2-fluorobenzaldehyde and purified by column chromatography on silica gel (60-120 mesh) using (hexane : EtOAc = 90 : 10). Pale yellow oil<sup>13</sup> 496 mg (62% yield). Spectroscopic data was identical with that previously reported.<sup>13</sup>

### General procedure (III) for synthesis of biaryl-2-amines<sup>14</sup>

To a 100 mL round bottom flask, aryl boronic acid (3.0 mmol), K<sub>2</sub>CO<sub>3</sub> (8.0 mmol), and Pd(PPh<sub>3</sub>)<sub>4</sub> (0.2 mmol) were dissolved in 15 mL of toluene followed by the addition of 3 mL of H<sub>2</sub>O and 5 mL of EtOH. 2-Bromoaniline (2.0 mmol) was then added and the resulting mixture was heated at 100 °C for 16 h. After cooling to room temperature, the reaction mixture was diluted

with 30 mL of saturated aqueous  $\text{NH}_4\text{Cl}$  and 30 mL of  $\text{CH}_2\text{Cl}_2$ . The aqueous phase was extracted with an additional  $2 \times 30$  mL of  $\text{CH}_2\text{Cl}_2$ , and the combined organic layers were washed with 30 mL of water and 30 mL of saturated aqueous  $\text{NaHCO}_3$ . The organic phase was dried over  $\text{Na}_2\text{SO}_4$  and filtered. The filtrate was concentrated in vacuo and purified by column chromatography on silica gel (60-120 mesh) using ethyl acetate/hexane as eluent.

#### Spectroscopic data of biaryl-2-amines

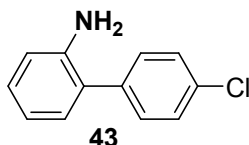

4'-chlorobiphenyl-2-amine (**43**): Following the general procedure (III), **43** was prepared from 4-chlorophenylboronic acid and 2-bromo aniline and purified by column chromatography on silica gel (60-120 mesh) using (hexane : EtOAc = 80 : 20). Yellow oil<sup>15</sup> 410 mg (69% yield). Spectroscopic data was identical with that previously reported.<sup>15</sup>

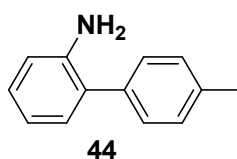

4'-methylbiphenyl-2-amine (**44**): Following the general procedure (III), **44** was prepared from 4-methylphenylboronic acid and 2-bromo aniline and purified by column chromatography on silica gel (60-120 mesh) using (hexane : EtOAc = 80 : 20). Brown oil<sup>16</sup> 332 mg (62% yield). Spectroscopic data was identical with that previously reported.<sup>16</sup>

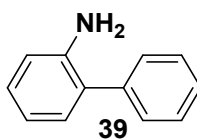

biphenyl-2-amine (**45**): Following the general procedure (III), **45** was prepared from phenylboronic acid and 2-bromo aniline and purified by column chromatography on silica gel (60-120 mesh) using (hexane : EtOAc = 80 : 20). Brown solid<sup>17</sup> 310 mg (63% yield). mp. 51-54 °C (lit<sup>17</sup> m.p. 52-54 °C); Spectroscopic data was identical with that previously reported.<sup>17</sup>

#### General procedure (IV) for synthesis of fluorenones, anthranone and xanthenes

Aldimine (0.25 mmol) was dissolved in DCE (1.0 ml) and added in mixture of  $\text{PhI}(\text{OAc})_2$  (0.375 mmol) and  $\text{BF}_3\text{-OEt}_2$  (0.375 mmol) in DCE (3 ml). The resulting reaction mixture was stirred at room temperature for 5 min and then was refluxed for 24-30 h at 80 °C and then cooled to room temperature. 1N HCl (2 ml) was added and stirred for 2-6 h at room temperature. Diluted with  $\text{H}_2\text{O}$  and extracted with diethyl ether (2 x 15 mL). The organic layers were combined, dried over  $\text{Na}_2\text{SO}_4$ , filtered and the solvent was removed under reduced pressure to afford the residue, which was purified by column chromatography on silica gel (230-400 mesh) using ethyl acetate/hexane as the eluent to provide the desired product.

#### Spectroscopic data of fluorenones, anthranone and xanthenes

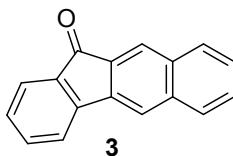

11H-benzo[b]fluoren-11-one (**3**): Following the general procedure (IV), **3** was prepared from aldimine **2** and purified by column chromatography on silica gel (230-400 mesh) using (hexane : EtOAc = 90 : 10). Yellow solid<sup>18</sup> (60 mg, 61% yield); m.p.: 142-144 °C (lit.<sup>18</sup> m.p. 141-142 °C); IR (KBr):  $\nu_{\text{max}}$  3042, 1710, 1604, 895  $\text{cm}^{-1}$ ;  $^1\text{H-NMR}$  (300 MHz,  $\text{CDCl}_3$ ):  $\delta$  8.17 (s, 1H), 7.89-7.86 (m, 2H), 7.85 (d,  $J = 7.7$  Hz, 1H), 7.77 (d,  $J = 7.6$  Hz, 1H), 7.73 (d,  $J = 7.6$  Hz, 1H), 7.57-7.53 (m, 2H), 7.46 (t,  $J = 7.6$  Hz, 1H), 7.32 (t,  $J = 7.6$  Hz, 1H);  $^{13}\text{C-NMR}$  (75 MHz,  $\text{CDCl}_3$ ):  $\delta$  193.1 (C), 144.8 (C), 138.5 (C), 136.9 (C), 136.2

(C), 135.0 (CH), 133.9 (C), 132.7 (C), 130.8 (CH), 129.1 (CH), 128.8 (CH), 128.7 (CH), 126.6 (CH), 125.6 (CH), 124.4 (CH), 120.8 (CH), 119.0 (CH); MS (ESI):  $m/z = 231.1$  (M+H)<sup>+</sup>; HRMS (ESI) calculated for C<sub>17</sub>H<sub>10</sub>O: 230.0732, found: 231.0734 (M+H)<sup>+</sup>. Spectroscopic data was compared with that previously reported.<sup>18</sup>

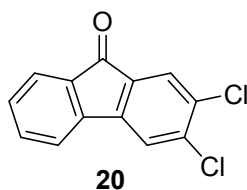

**2,3-dichloro-9H-fluoren-9-one (20):** Following the general procedure (IV), **20** was prepared from aldimine **12** and purified by column chromatography on silica gel (230-400 mesh) using (hexane : EtOAc = 85 : 15). Yellow solid (64 mg, 65% yield); m.p.: 134-136 °C; IR (KBr):  $\nu_{\max}$  1712, 1602, 777 cm<sup>-1</sup>; <sup>1</sup>H-NMR (300 MHz, CDCl<sub>3</sub>):  $\delta$  7.75 (s, 1H), 7.61 (s, 1H), 7.57 (dd,  $J = 7.8, 1.5$  Hz, 1H), 7.49 (dd,  $J = 7.5, 1.4$  Hz, 1H), 7.43-7.37 (m, 1H), 7.31-7.25 (m, 1H); <sup>13</sup>C-NMR (75 MHz, CDCl<sub>3</sub>):  $\delta$  195.9 (C), 143.8 (C), 142.5 (C), 140.4 (C), 136.9 (C), 136.1 (C), 135.7 (C), 133.9 (C), 129.5 (CH), 128.3 (CH), 125.8 (CH), 123.0 (CH), 122.2 (CH); MS (ESI):  $m/z = 249.1$  (M+H)<sup>+</sup>; HRMS (ESI) calculated for C<sub>13</sub>H<sub>6</sub>Cl<sub>2</sub>O: 247.9796, found: 248.9798 (M+H)<sup>+</sup>.

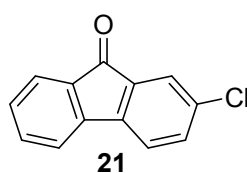

**2-chloro-9H-fluoren-9-one (21):** Following the general procedure (IV), **21** was prepared from aldimine **13** and purified by column chromatography on silica gel (230-400 mesh) using (hexane : EtOAc = 90 : 10). Pale yellow solid<sup>19</sup> 58 mg (59% yield). m.p.: 120-121 °C (lit.<sup>19</sup> mp 118-120 °C); Spectroscopic data was identical with that previously reported.<sup>19</sup>

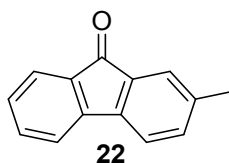

**2-methyl-9H-fluoren-9-one (22):** Following the general procedure (IV), **22** was prepared from aldimine **14** and purified by column chromatography on silica gel (230-400 mesh) using (hexane : EtOAc = 90 : 10). Yellow solid<sup>19</sup> 56 mg (57% yield). m.p.: 92-94 °C (lit.<sup>19</sup> mp 92 °C); Spectroscopic data was identical with that previously reported.<sup>19</sup>

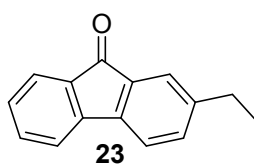

**2-ethyl-9H-fluoren-9-one (23):** Following the general procedure (IV), **23** was prepared from aldimine **15** and purified by column chromatography on silica gel (230-400 mesh) using (hexane : EtOAc = 90 : 10). Pale yellow oil 56 mg (57% yield); IR (Neat): 1720, 1600, 1485, 1440 cm<sup>-1</sup>; <sup>1</sup>H-NMR (300 MHz, CDCl<sub>3</sub>):  $\delta$  7.64-7.58 (m, 2H), 7.50-7.41 (m, 3H), 7.30-7.22 (m, 2H), 2.72 (q,  $J = 6.8$  Hz, 2H), 1.30 (t,  $J = 6.6$  Hz, 3H); <sup>13</sup>C-NMR (75 MHz, CDCl<sub>3</sub>):  $\delta$  194.2 (C), 144.9 (C), 141.2 (C), 139.8 (C), 135.9 (C), 135.4 (C), 134.7 (CH), 134.5 (CH), 128.5 (CH), 125.7 (CH), 125.2 (CH), 121.5 (CH), 121.1 (CH), 28.7 (CH<sub>2</sub>), 13.0 (CH<sub>3</sub>); MS (ESI):  $m/z = 209.1$  (M+H)<sup>+</sup>; HRMS (ESI) calculated for C<sub>15</sub>H<sub>12</sub>O: 208.0888, found: 209.0887 (M+H)<sup>+</sup>.

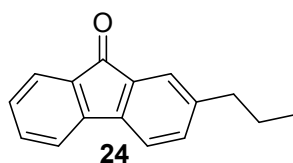

**2-propyl-9H-fluoren-9-one (24):** Following the general procedure (IV), **24** was prepared from aldimine **16** and purified by column chromatography on silica gel (230-400 mesh) using (hexane : EtOAc = 90 : 10). Yellow oil 54 mg (55% yield); IR (Neat): 2935, 1722, 1605, 1480, 1450 cm<sup>-1</sup>; <sup>1</sup>H-NMR (300 MHz, CDCl<sub>3</sub>):  $\delta$  7.65 (d,  $J = 1.3$  Hz, 1H), 7.58 (dd,  $J = 7.3, 1.5$  Hz,

1H), 7.51-7.46 (m, 2H), 7.43-7.34 (m, 2H), 7.31-7.26 (m, 1H), 2.54 (t,  $J = 7.4$  Hz, 2H), 1.78-1.67 (m, 2H), 1.05 (t,  $J = 6.5$  Hz, 3H);  $^{13}\text{C}$ -NMR (75 MHz,  $\text{CDCl}_3$ ):  $\delta$  194.4 (C), 144.1 (C), 141.4 (C), 139.2 (C), 135.6 (C), 134.8 (C), 134.2 (CH), 133.6 (CH), 128.8 (CH), 128.3 (CH), 125.8 (CH), 121.8 (CH), 121.4 (CH), 38.6 ( $\text{CH}_2$ ), 24.5 ( $\text{CH}_2$ ), 13.0 ( $\text{CH}_3$ ); MS (ESI):  $m/z = 223.1$  ( $\text{M}+\text{H}$ ) $^+$ ; HRMS (ESI) calculated for  $\text{C}_{16}\text{H}_{14}\text{O}$ : 222.1045, found: 223.1044 ( $\text{M}+\text{H}$ ) $^+$ .

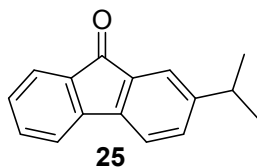

2-isopropyl-9H-fluoren-9-one (**25**): Following the general procedure (**IV**), **25** was prepared from aldimine **17** and purified by column chromatography on silica gel (230-400 mesh) using (hexane : EtOAc = 90 : 10). Yellow oil (57 mg, 58% yield); IR (Neat): 1710, 1612, 1380  $\text{cm}^{-1}$ ;  $^1\text{H}$ -NMR (300 MHz,  $\text{CDCl}_3$ ):  $\delta$  7.67 (d,  $J = 1.3$  Hz, 1H), 7.63 (dd,  $J = 7.4, 1.3$  Hz, 1H), 7.51-7.47 (m, 3H), 7.38 (dd,  $J = 7.4, 1.3$  Hz, 1H), 7.31-7.25 (m, 1H), 3.23-3.11 (m, 1H), 1.33 (d,  $J = 6.4$  Hz, 6H);  $^{13}\text{C}$ -NMR (75 MHz,  $\text{CDCl}_3$ ):  $\delta$  194.2 (C), 144.9 (C), 143.2 (C), 141.6 (C), 139.1 (C), 135.4 (C), 134.5 (CH), 130.3 (CH), 127.5 (CH), 125.1 (CH), 121.9 (CH), 121.1 (CH), 119.1 (CH), 34.3 (C), 23.2 ( $2\text{CH}_3$ ); MS (ESI):  $m/z = 223.1$  ( $\text{M}+\text{H}$ ) $^+$ ; HRMS (ESI) calculated for  $\text{C}_{16}\text{H}_{14}\text{O}$ : 222.1045, found: 223.1042 ( $\text{M}+\text{H}$ ) $^+$ .

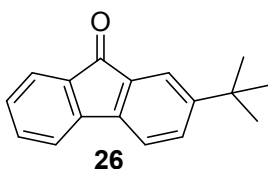

2-tert-butyl-9H-fluoren-9-one (**26**): Following the general procedure (**IV**), **26** was prepared from aldimine **18** and purified by column chromatography on silica gel (230-400 mesh) using (hexane : EtOAc = 90 : 10). Yellow oil (54 mg, 55% yield); IR (Neat): 1712, 1595, 1385  $\text{cm}^{-1}$ ;  $^1\text{H}$ -NMR (300 MHz,  $\text{CDCl}_3$ ):  $\delta$  7.66 (d,  $J = 1.4$  Hz, 1H), 7.59 (dd,  $J = 7.5, 1.4$  Hz, 1H), 7.47-7.33 (m, 4H), 7.27-7.22 (m, 1H), 1.35 (s, 9H);  $^{13}\text{C}$ -NMR (75 MHz,  $\text{CDCl}_3$ ):  $\delta$  194.3 (C), 151.9 (C), 144.3 (C), 141.7 (C), 138.4 (C), 135.5 (C), 134.6 (CH), 130.9 (CH), 128.7 (CH), 125.2 (CH), 122.9 (CH), 121.3 (CH), 119.9 (CH), 35.0 (C), 31.4 ( $3\text{CH}_3$ ); MS (ESI):  $m/z = 237.1$  ( $\text{M}+\text{H}$ ) $^+$ ; HRMS (ESI) calculated for  $\text{C}_{17}\text{H}_{16}\text{O}$ : 236.1201, found: 237.1211 ( $\text{M}+\text{H}$ ) $^+$ .

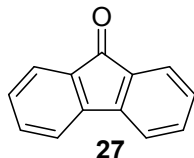

9H-fluoren-9-one (**27**): Following the general procedure (**IV**), **27** was prepared from aldimine **19** and purified by column chromatography on silica gel (230-400 mesh) using (hexane : EtOAc = 90 : 10). Yellow solid<sup>20</sup> 46 mg (47% yield). m.p.: 82-85  $^{\circ}\text{C}$  (lit.<sup>20</sup> mp 82-83  $^{\circ}\text{C}$ ); Spectroscopic data was identical with that previously reported.<sup>20</sup>

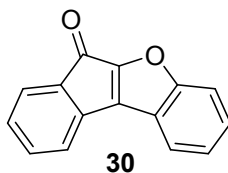

6H-benzo[d]indeno[2,1-b]furan-6-one (**30**) Following the general procedure (**IV**), **30** was prepared from aldimine **29** and purified by column chromatography on silica gel (230-400 mesh) using (hexane : EtOAc = 90 : 10). Orange yellow solid<sup>21</sup> (42 mg, 66% yield); m.p.: 110-112  $^{\circ}\text{C}$  (lit.<sup>21</sup> m.p. 109-110  $^{\circ}\text{C}$ ); IR (KBr):  $\nu_{\text{max}}$  3025, 1720  $\text{cm}^{-1}$ ;  $^1\text{H}$  NMR (300 MHz,  $\text{CDCl}_3$ ):  $\delta$  7.72 (dd,  $J = 7.9, 0.4$  Hz, 1H), 7.62 (d,  $J = 8.0$  Hz, 1H), 7.61-7.47 (m, 1H), 7.45-7.17 (m, 4H);  $^{13}\text{C}$  NMR (75 MHz,  $\text{CDCl}_3$ ):  $\delta$  179.6 (C), 163.2 (C), 155.9 (C), 144.9 (C), 141.0 (C), 135.3 (C), 135.2 (CH), 128.4 (2CH), 127.9 (C), 121.8 (CH), 120.8 (CH), 120.1 (CH), 116.8 (CH), 112.6 (CH); MS (ESI):  $m/z = 221.2$  ( $\text{M}+\text{H}$ ) $^+$ ; HRMS (ESI) calculated for  $\text{C}_{15}\text{H}_{18}\text{O}_2$ : 220.0524, found: 221.0525 ( $\text{M}+\text{H}$ ) $^+$ . Spectroscopic data was compared with that previously reported.<sup>21</sup>



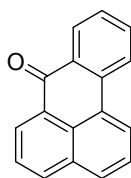

**33**

7H-benzo[de]anthracen-7-one (**33**) Following the general procedure (**IV**), **33** was prepared from aldimine **31** and purified by column chromatography on silica gel (230-400 mesh) using (hexane : EtOAc = 90 : 10). Yellow solid<sup>18</sup> (44 mg, 68% yield); m.p.: 160-162 °C (lit.<sup>18</sup> m.p. 162-1664 °C); IR (KBr):  $\nu_{\max}$  3040, 1650, 1597  $\text{cm}^{-1}$ ; <sup>1</sup>H NMR (300 MHz, CDCl<sub>3</sub>):  $\delta$  8.77 (d,  $J$  = 7.6 Hz, 1H), 8.52 (d,  $J$  = 7.2 Hz, 1H), 8.45 (d,  $J$  = 7.2 Hz, 1H), 8.32 (d,  $J$  = 8.0 Hz, 1H), 8.22 (d,  $J$  = 8.0 Hz, 1H), 8.00 (d,  $J$  = 8.0 Hz, 1H), 7.88-7.72 (m, 2H), 7.69 (t,  $J$  = 8.0 Hz, 1H), 7.54 (t,  $J$  = 7.7 Hz, 1H); <sup>13</sup>C NMR (75 MHz, CDCl<sub>3</sub>):  $\delta$  183.8 (C), 136.1 (C), 135.1 (CH), 133.5 (CH), 133.0 (C), 131.3 (C), 130.2 (CH), 129.7 (CH), 128.5 (C), 128.2 (CH), 128.1 (CH), 127.9 (C), 126.8 (C), 126.5 (CH), 126.5 (CH), 124.1 (CH), 123.0 (CH); MS (ESI):  $m/z$  = 231.1 (M+H)<sup>+</sup>; HRMS (ESI) calculated for C<sub>17</sub>H<sub>10</sub>O: 230.0732, found: 231.0733 (M+H)<sup>+</sup>. Spectroscopic data was compared with that previously reported.<sup>18</sup>

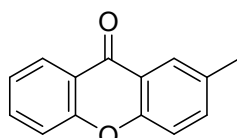

**40**

2-methyl-9H-xanthen-9-one (**40**): Following the general procedure (**IV**), **40** was prepared from aldimine **37** and purified by column chromatography on silica gel (230-400 mesh) using (hexane : EtOAc = 90 : 10). Pale yellow oil<sup>22</sup> 76 mg (74% yield). IR (KBr):  $\nu_{\max}$  3060, 2920, 2864, 1658  $\text{cm}^{-1}$ ; <sup>1</sup>H-NMR (300 MHz, CDCl<sub>3</sub>):  $\delta$  8.27 (dd,  $J$  = 7.8, 1.6 Hz, 1H), 8.05 (s, 1H), 7.72-7.67 (m, 1H), 7.49-7.38 (m, 3H), 7.33 (d,  $J$  = 7.5 Hz, 1H), 2.41 (s, 3H); <sup>13</sup>C-NMR (75 MHz, CDCl<sub>3</sub>):  $\delta$  177.3 (C), 156.4 (C), 154.3 (C), 136.3 (CH), 134.8 (CH), 133.4 (C), 126.1 (CH), 125.7 (CH), 123.5 (CH), 121.9 (C), 119.2 (C), 118.7 (CH), 118.3 (CH), 20.8 (CH<sub>3</sub>); MS (ESI):  $m/z$  = 211.1 (M+H)<sup>+</sup>; HRMS (ESI) calculated for C<sub>14</sub>H<sub>10</sub>O<sub>2</sub>: 210.0681, found: 211.0685 (M+H)<sup>+</sup>. Spectroscopic data was compared with that previously reported.<sup>2</sup>

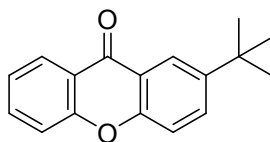

**41**

2-tert-butyl-9H-xanthen-9-one (**41**): Following the general procedure (**IV**), **35** was prepared from aldimine **38** and purified by column chromatography on silica gel (230-400 mesh) using (hexane : EtOAc = 90 : 10). Yellow oil<sup>23</sup> (67 mg, 68% yield); IR (Neat):  $\nu_{\max}$  2965, 2867, 1661  $\text{cm}^{-1}$ ; <sup>1</sup>H-NMR (300 MHz, CDCl<sub>3</sub>):  $\delta$  8.32-8.28 (m, 2H), 7.77 (dd,  $J$  = 8.8, 2.5 Hz, 1H), 7.72-7.67 (m, 1H), 7.49-7.43 (m, 2H), 7.39-7.33 (m, 1H), 1.40 (s, 9H); <sup>13</sup>C-NMR (75 MHz, CDCl<sub>3</sub>):  $\delta$  177.4 (C), 156.5 (C), 154.9 (C), 147.6 (C), 134.8 (CH), 133.5 (CH), 127.4 (CH), 123.7 (CH), 122.7 (CH), 122.0 (C), 121.3 (C), 118.1 (CH), 117.8 (CH), 35.4 (C), 31.7 (3CH<sub>3</sub>); MS (ESI):  $m/z$  = 253.1 (M+H)<sup>+</sup>; HRMS (ESI) calculated for C<sub>17</sub>H<sub>16</sub>O<sub>2</sub>: 252.1150, found: 253.1155 (M+H)<sup>+</sup>. Spectroscopic data was compared with that previously reported.<sup>2</sup>

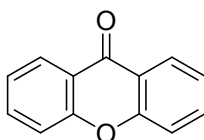

**42**

9H-xanthen-9-one (**42**): Following the general procedure (**IV**), **42** was prepared from aldimine **39** and purified by column chromatography on silica gel (230-400 mesh) using (hexane : EtOAc = 90 : 10). White solid<sup>24</sup> 53 mg (54% yield). m.p.: 172-174 °C (lit.<sup>24</sup> m.p. 176-177 °C); IR (KBr):  $\nu_{\max}$  2920, 2870, 1655, 1458  $\text{cm}^{-1}$ ; <sup>1</sup>H-NMR (300 MHz, CDCl<sub>3</sub>):  $\delta$  8.30 (d,  $J$  = 7.9 Hz, 2H), 7.69-7.64 (m, 2H), 7.42 (d,  $J$  = 8.4 Hz, 2H), 7.33 (t,  $J$  = 7.2 Hz, 2H); <sup>13</sup>C-NMR (75 MHz, CDCl<sub>3</sub>):  $\delta$  177.2 (C), 156.2 (C), 134.8 (2CH), 126.6 (2CH), 124.1 (2CH), 121.7 (C), 118.0 (2CH); MS (ESI):  $m/z$  = 197.1 (M+H)<sup>+</sup>; HRMS (ESI) calculated for C<sub>13</sub>H<sub>8</sub>O<sub>2</sub>: 196.0524, found: 197.0525 (M+H)<sup>+</sup>. Spectroscopic data was identical with that previously reported.<sup>24</sup>

## General procedure (V) for synthesis of phenanthridines

Aldimine (0.25 mmol) was dissolved in DCE (1 ml) and added in a mixture of  $\text{PhI}(\text{OAc})_2$  (0.375 mmol) and  $\text{BF}_3\text{-OEt}_2$  (0.375 mmol) in DCE (3 ml). The resulting reaction mixture was stirred at room temperature for 5 min and then was refluxed for 30 h at 80 °C and then cooled to room temperature. Diluted with  $\text{H}_2\text{O}$  and extracted with diethyl ether (2 x 15 mL). The organic layers were combined, dried over  $\text{Na}_2\text{SO}_4$ , filtered, and the solvent removed under reduced pressure to afford the residue, which was purified by column chromatography on silica gel (230-400 mesh) using ethyl acetate/hexanes as the eluent to provide the desired product.

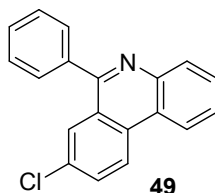

8-chloro-6-phenylphenanthridine (**49**): Following the general procedure (V), **49** was prepared from aldimine **46** and purified by column chromatography on silica gel (230-400 mesh) using (hexane : EtOAc = 80 : 20). White solid (57 mg, 58% yield); m.p.: 143-145 °C; IR (Neat): 3062, 2990, 2927, 1606, 1510, 1495, 1466, 1455, 1354, 1250, 1235, 1170, 1032, 830, 777, 735, 726  $\text{cm}^{-1}$ ;  $^1\text{H-NMR}$  (300 MHz,  $\text{CDCl}_3$ ):  $\delta$  8.55 (d,  $J = 7.7$  Hz, 1H), 8.51 (d,  $J = 7.7$  Hz, 1H), 8.33 (d,  $J = 7.3$  Hz, 1H), 7.88 (s, 1H), 7.66-7.58 (m, 5H), 7.56-7.54 (m, 3H);  $^{13}\text{C-NMR}$  (75 MHz,  $\text{CDCl}_3$ ):  $\delta$  160.1 (C), 144.2 (C), 139.9 (C), 135.3 (C), 132.6 (C), 131.6 (CH), 130.8 (CH), 129.5 (CH), 128.9 (2CH), 128.8 (CH), 128.7 (2CH), 127.9 (CH), 127.3 (CH), 125.7 (C), 124.2 (C), 122.2 (CH), 121.6 (CH); MS (ESI):  $m/z = 290.1$  (M+H) $^+$ ; HRMS (ESI) calculated for  $\text{C}_{20}\text{H}_{12}\text{ClN}$ : 289.0658, found: 290.0655 (M+H) $^+$ .

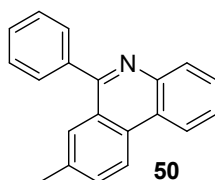

8-methyl-6-phenylphenanthridine (**50**): Following the general procedure (V), **50** was prepared from aldimine **47** and purified by column chromatography on silica gel (230-400 mesh) using (hexane : EtOAc = 80 : 20). Yellow oil<sup>25</sup> (56 mg, 57% yield); IR (Neat):  $\nu_{\text{max}}$  3060, 2920, 1580, 1562, 1460, 1365, 1230, 766, 733, 703  $\text{cm}^{-1}$ ;  $^1\text{H-NMR}$  (300 MHz,  $\text{CDCl}_3$ ):  $\delta$  8.58 (d,  $J = 8.2$  Hz, 1H), 8.48 (d,  $J = 7.8$  Hz, 1H), 8.23 (d,  $J = 7.8$  Hz, 1H), 7.87 (s, 1H), 7.75-7.65 (m, 5H), 7.59-7.52 (m, 3H), 2.51 (s, 3H);  $^{13}\text{C-NMR}$  (75 MHz,  $\text{CDCl}_3$ ):  $\delta$  161.3 (C), 143.8 (C), 139.8 (C), 137.1 (C), 132.3 (CH), 131.2 (C), 130.2 (CH), 129.5 (CH), 128.7 (2CH), 128.5 (CH), 128.4 (2CH), 128.2 (CH), 127.2 (CH), 125.3 (C), 124.0 (C), 122.0 (CH), 121.5 (CH), 21.7 (CH<sub>3</sub>); MS (ESI):  $m/z = 270.1$  (M+H) $^+$ ; HRMS (ESI) calculated for  $\text{C}_{20}\text{H}_{15}\text{N}$ : 269.1204, found: 270.1206 (M+H) $^+$ . Spectroscopic data was compared with that previously reported.<sup>25</sup>

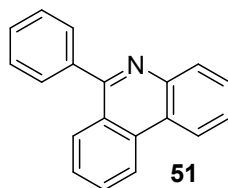

6-phenylphenanthridine (**51**): Following the general procedure (V), **51** was prepared from aldimine **48** and purified by column chromatography on silica gel (230-400 mesh) using (hexane : EtOAc = 80 : 20). White solid<sup>26</sup> 49 mg (48% yield). m.p.: 105-106 °C (lit.<sup>26</sup> mp 109 °C); IR (KBr):  $\nu_{\text{max}}$  3058, 3020, 2926, 2851, 1560, 1482, 1458, 1444, 1361, 1330, 1300, 1228, 1135, 1073, 1029, 956, 784, 763, 727, 701, 672  $\text{cm}^{-1}$ ;  $^1\text{H-NMR}$  (300 MHz,  $\text{CDCl}_3$ ):  $\delta$  8.64 (d,  $J = 8.4$  Hz, 1H), 8.55 (d,  $J = 8.4$  Hz, 1H), 8.28 (d,  $J = 7.7$  Hz, 1H), 8.11 (d,  $J = 8.1$  Hz, 1H), 7.86-7.56 (m, 9H);  $^{13}\text{C-NMR}$  (75 MHz,  $\text{CDCl}_3$ ):  $\delta$  161.2 (C), 143.7 (C), 139.8 (C), 133.3 (C), 130.5 (CH), 130.2 (CH), 129.7 (2CH), 128.8 (C), 128.8 (CH), 128.7 (CH), 128.3 (CH), 127.0 (CH), 126.7 (CH), 125.2 (C), 123.6 (C), 122.1 (CH), 121.9 (CH); MS (ESI):  $m/z = 256.1$  (M+H) $^+$ ; HRMS (ESI) calculated for  $\text{C}_{19}\text{H}_{13}\text{N}$ : 255.1048, found: 256.1044 (M+H) $^+$ . Spectroscopic data was compared with that previously reported.<sup>26</sup>

## References:

1. M. Shiino, Y. Watanabe, K. Umezawa, *Bioorg. Med. Chem.*, 2001, **9**, 1233.
2. J. Zhao, D. Yue, M. A. Campo, R. C. Larock, *J. Am. Chem. Soc.*, 2007, **129**, 5288.
3. X. Yu, X. Lu, *Tetrahedron Lett.*, 2011, **52**, 2076; G. Li, E. Wang, H. Chen, H. F. Li, Y. H. Liu, P. G. Wang, *Tetrahedron*, 2008, **64**, 9033.
4. D. Goubet, P. Meric, J.-R. Dormoy, P. Moreau, *J. Org. Chem.*, 1999, **64**, 4516.
5. Centre International de Recherches Dermatologiques. Patent, US6150413 A1, 2000.
6. Merck patent gmbh. Patent, WO2004/37806 A1, 2004.
7. E. Chosson, C. Rochais, R. Legay, S. De Oliveira, S. Rault, P. Dallemagne, *Tetrahedron*, 2011, **67**, 2548.
8. G. A. Molander, B. Biolatto, *Org. Lett.*, 2002, **4**, 1867.
9. F. Ye, Y. Shi, L. Zhou, Q. Xiao, Y. Zhang, J. Wang, *Org. Lett.*, 2011, **13**, 5020.
10. Sharma, A. K.; Gowdahalli, K.; Krzeminski, J.; Amin, S. *J. Org. Chem.* **2007**, *72*, 8987.
11. S. K. Das, R. Singh, G. Panda, *Eur. J. Org. Chem.*, 2009, **28**, 4757.
12. C. Jiuxi, X. Wang, X. Zheng, J. Ding, M. Liu, H. Wu, *Tetrahedron*, 2012, **68**, 8905.
13. C. H. Burgos, T. E. Barder, X. H. Huang, S. L. Buchwald, *Angew. Chem. Int. Ed.*, 2006, **45**, 4321.
14. S. H. Cho, J. Yoon, S. Chang, *J. Am. Chem. Soc.*, 2011, **133**, 5996.
15. A. C. Spivey, C.-C. Tseng, J. P. Hannah, C. J. G. Gripton, P. D. Fraine, N. J. Parrd, J. J. Scicinskid, *Chem. Commun.*, 2007, 2926.
16. T. Pirali, F. Zhang, A. H. Miller, J. L. Head, D. McAusland, M. F. Greaney, *Angew. Chem. Int. Ed.*, 2012, **51**, 1006.
17. T. Maejima, Y. Shimoda, K. Nozaki, S. Mori, Y. Sawama, Y. Monguchi, H. Sajiki, *Tetrahedron*, 2012, **68**, 1712.
18. P. Gandeepan, C.-H. Hung, C.-H. Cheng, *Chem. Commun.*, 2012, **48**, 9379.
19. V. S. Thirunavukkarasu, C.-H. Cheng, *Chem. Eur. J.*, 2011, **17**, 14723.
20. S. Paul, S. Samanta, J. K. Ray, *Tetrahedron Lett.*, 2010, **51**, 5604.
21. M. A. Campo, R. C. Larock, *J. Org. Chem.*, 2002, **67**, 5616.
22. S. Wang, K. Xie, Z. Tan, X. An, X. Zhou, C.-C. Guo, Z. Peng, *Chem. Commun.*, 2009, 6469.
23. P. Wang, H. Rao, R. Hua, C.-J. Li, *Org. Lett.*, 2012, **14**, 902.
24. T. Dohi, *J. Org. Chem.*, 2008, **73**, 7365.
25. S. W. Youn, J. H. Bihn, *Tetrahedron Lett.*, 2009, **50**, 4598.
26. M. Tobisu, I. Hyodo, N. Chatani, *J. Am. Chem. Soc.*, 2009, **131**, 12070.

Copies of <sup>1</sup>H-NMR and <sup>13</sup>C-NMR:

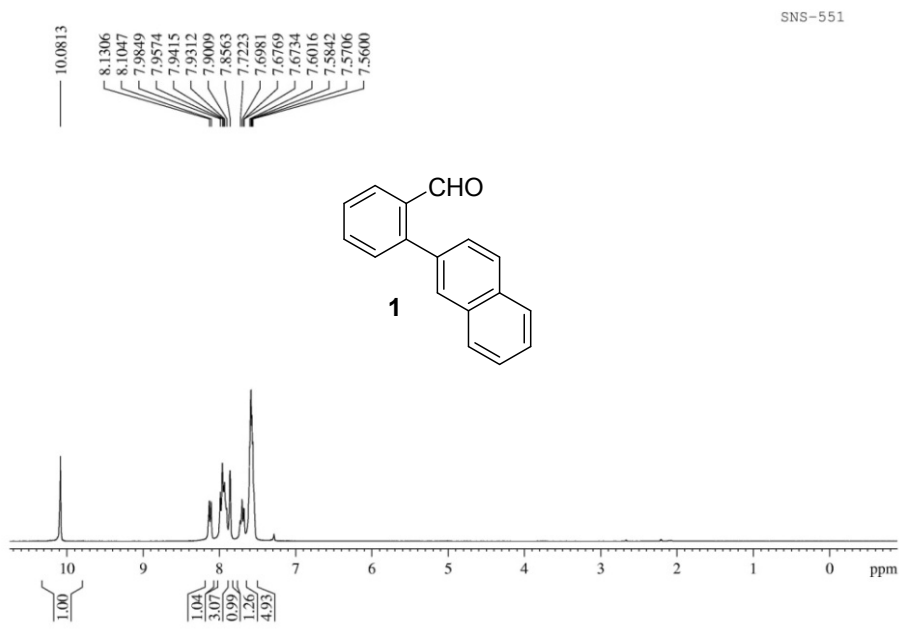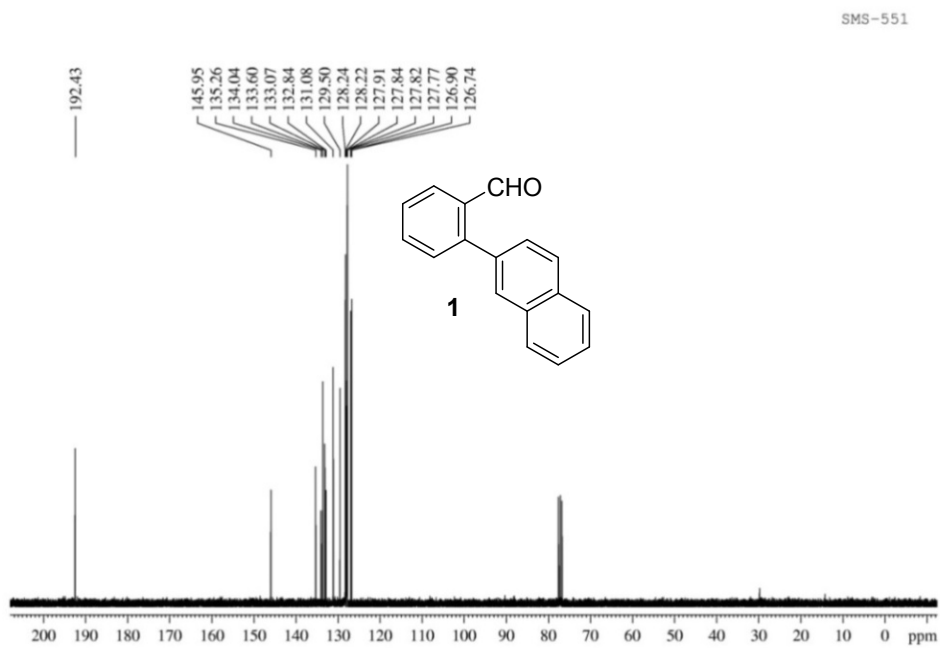

SNS-360

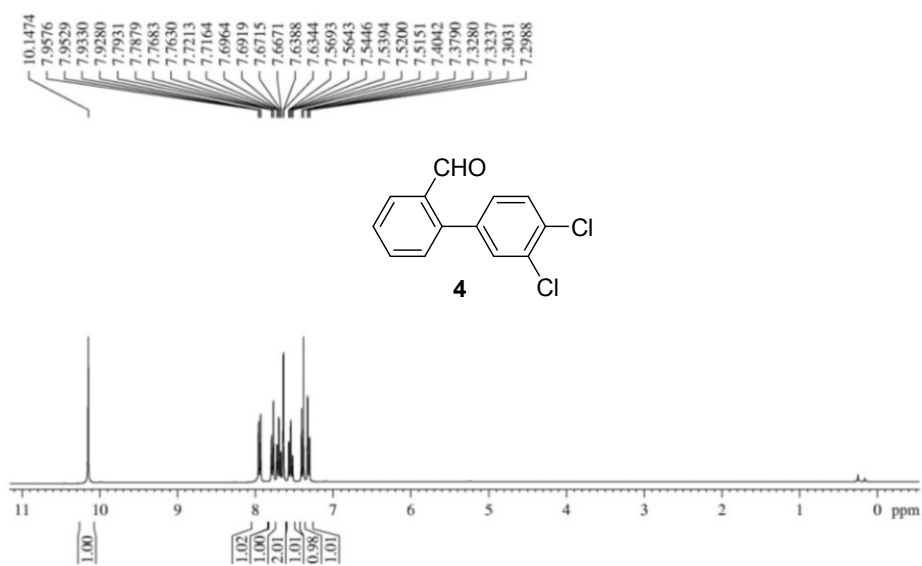

SNS-360

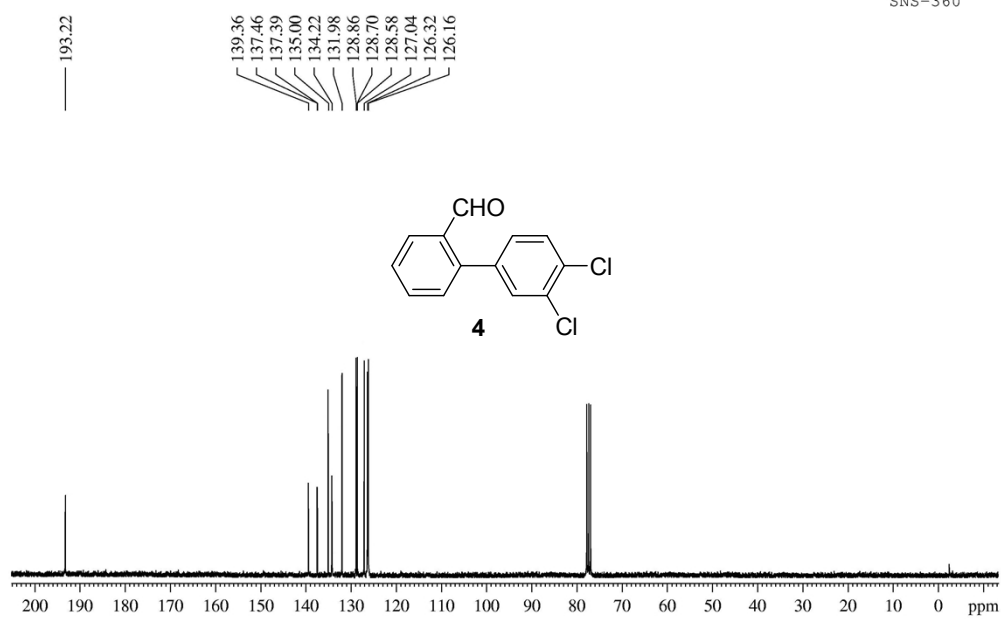

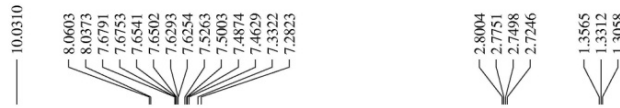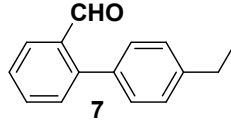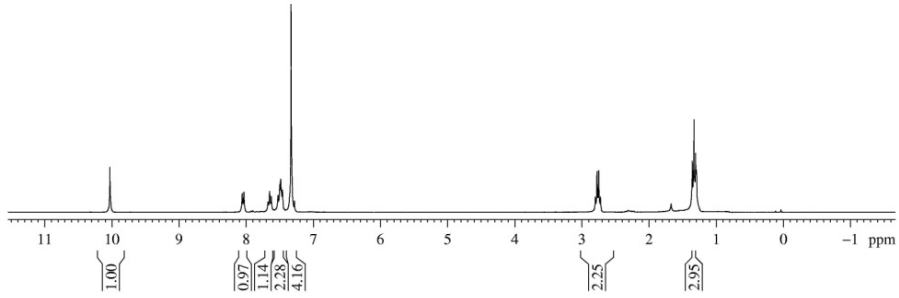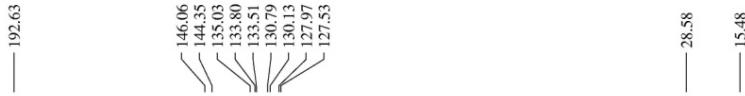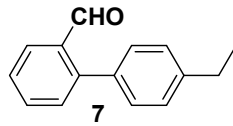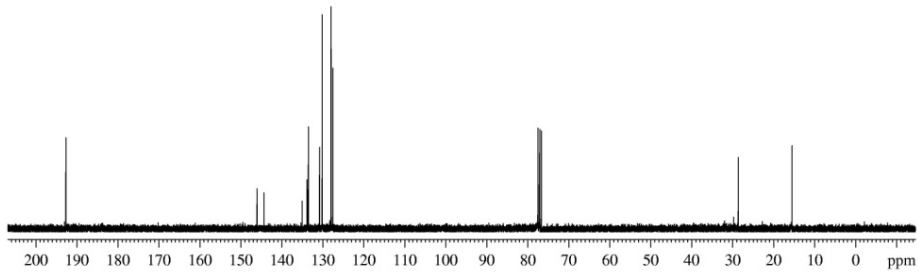

SNS-551 P

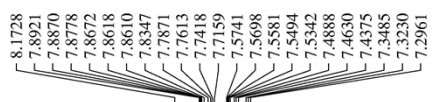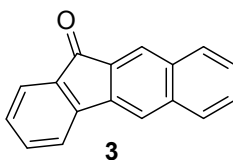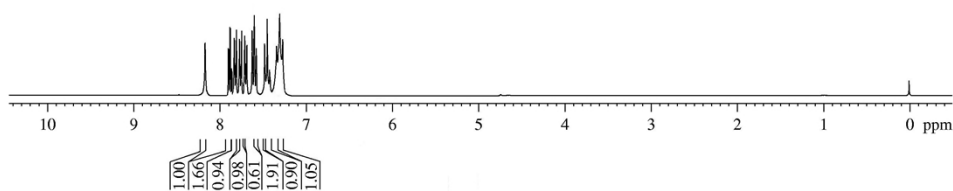

SNS-551P

193.17

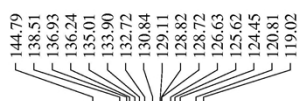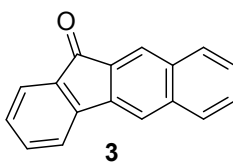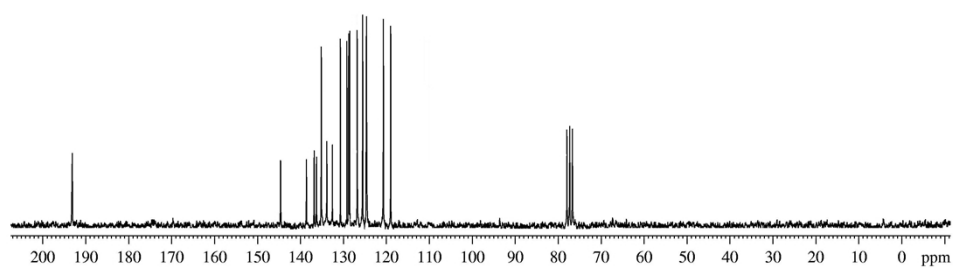

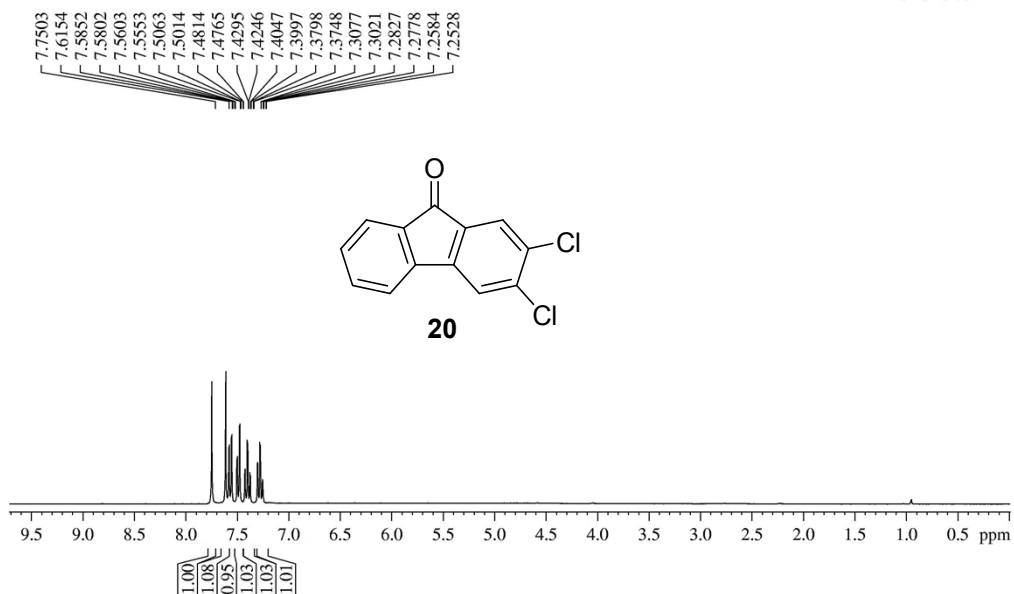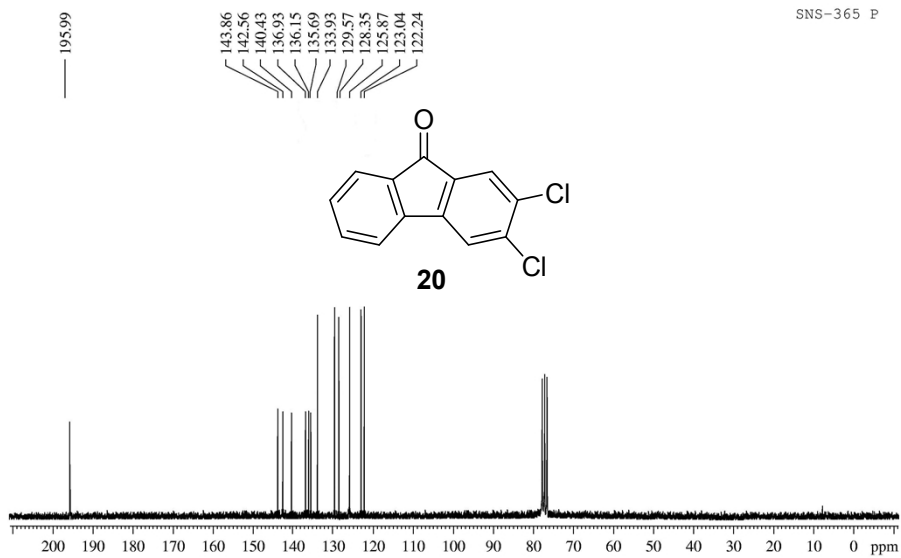



SNS-527 P

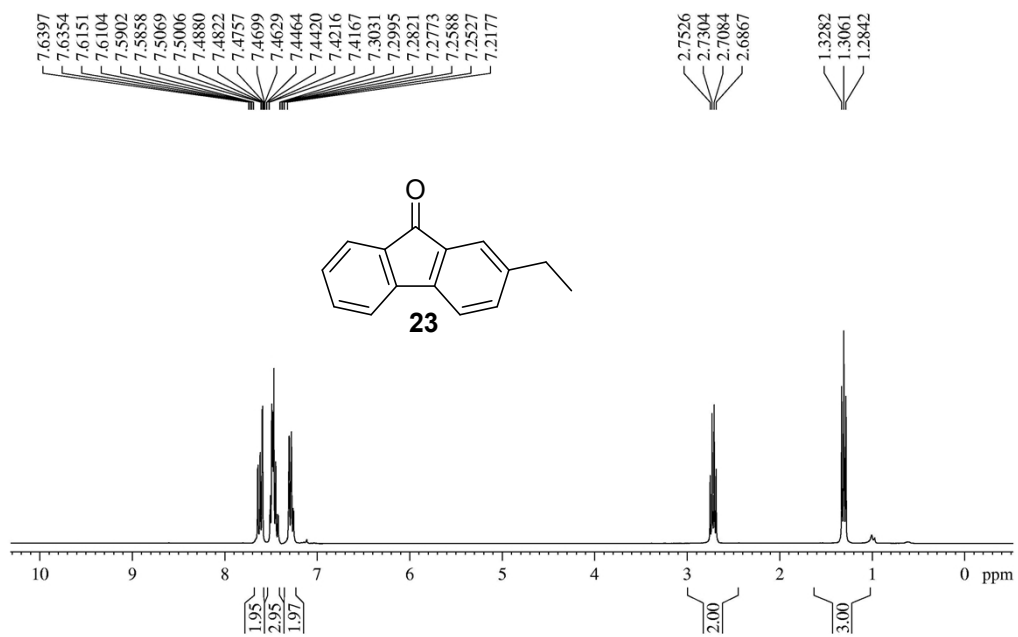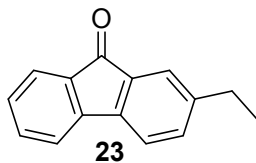

SNS-527 P

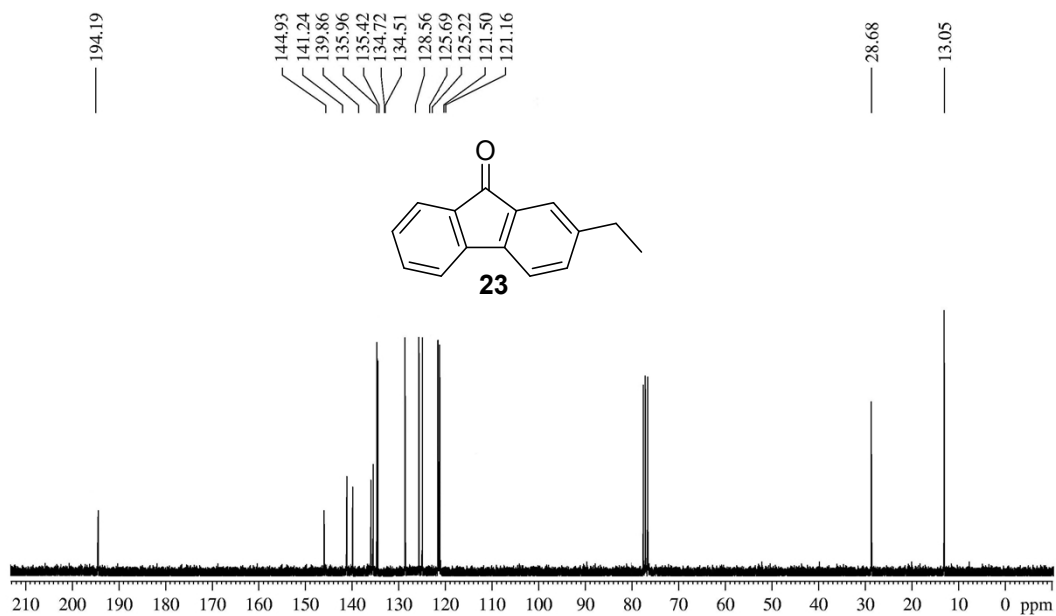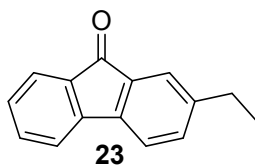

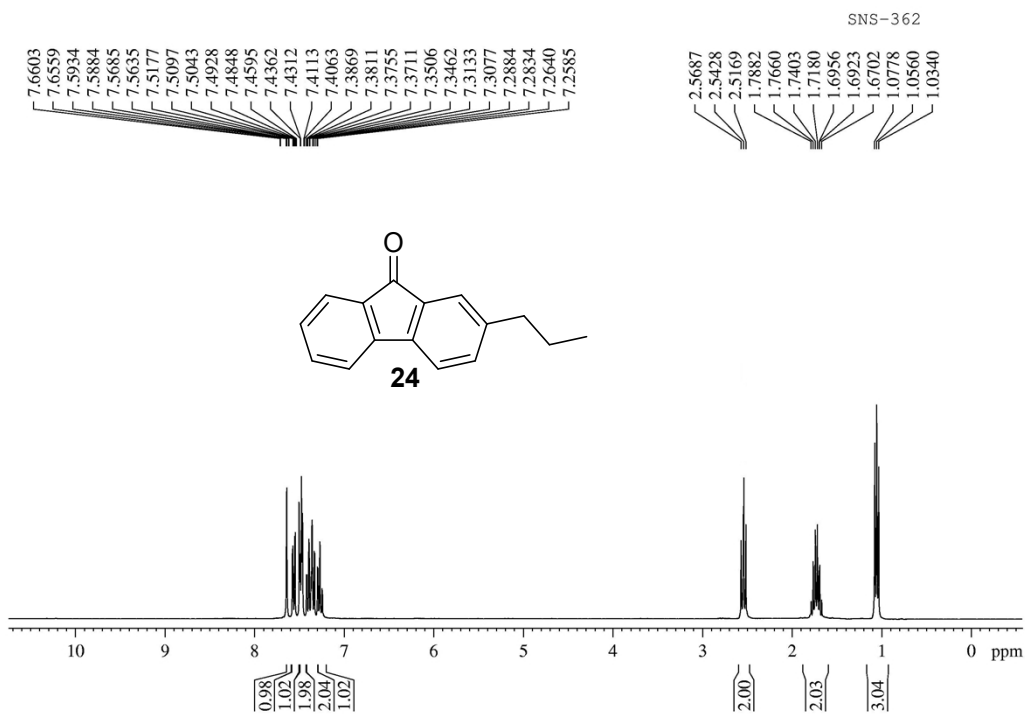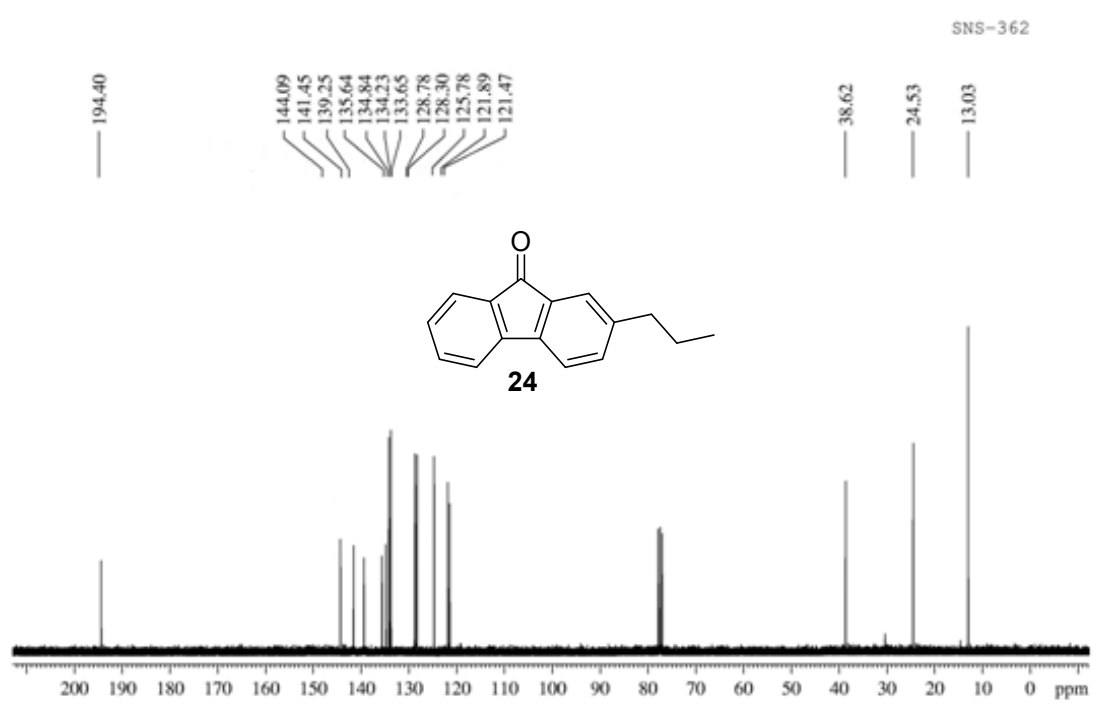

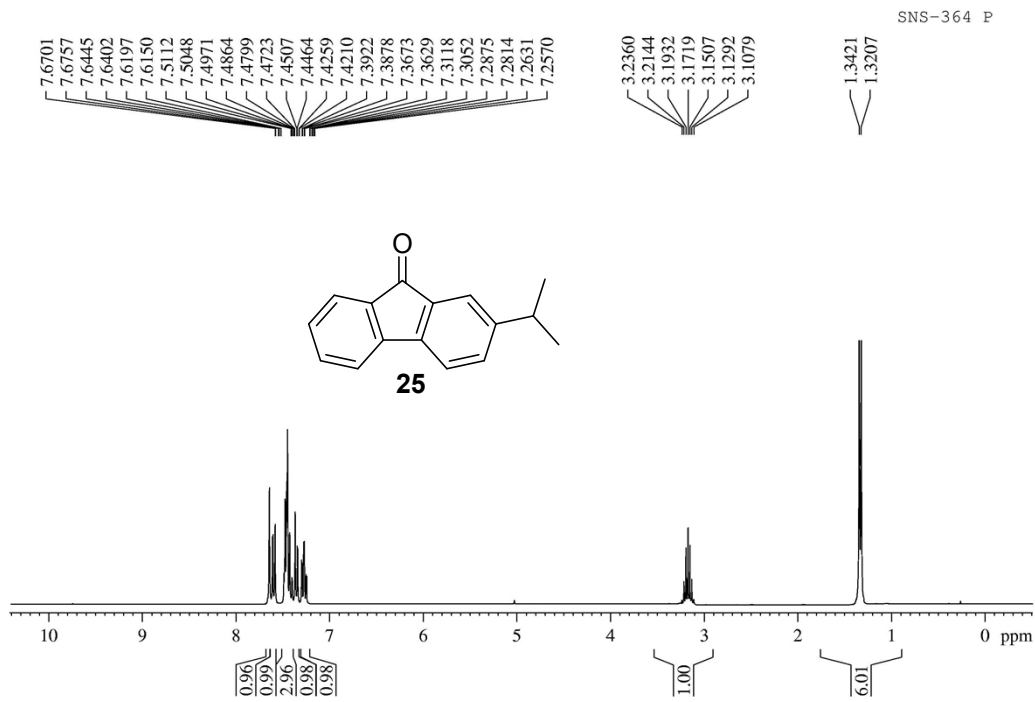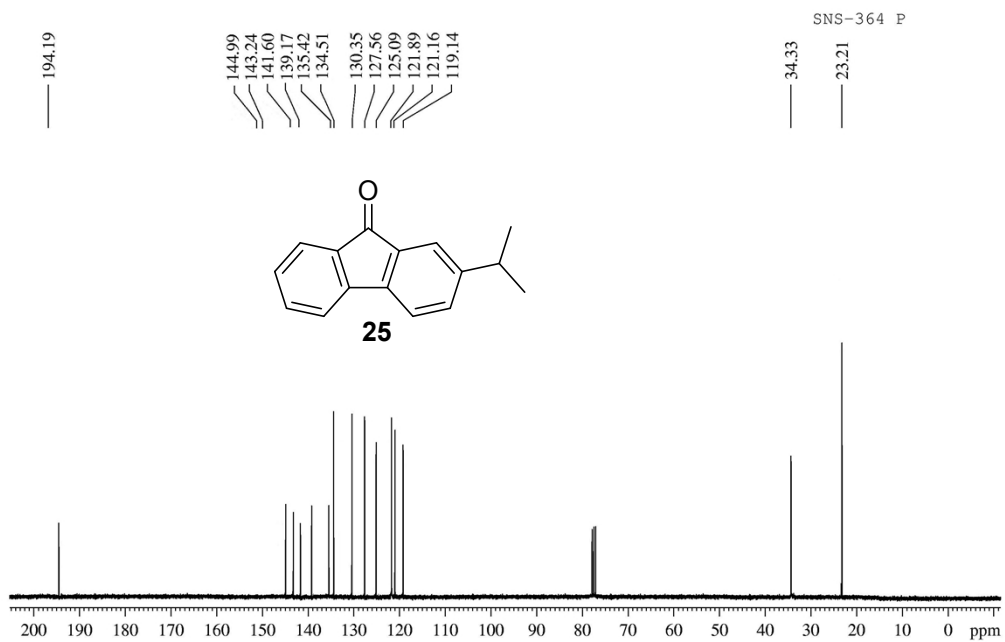

SNS-363 P

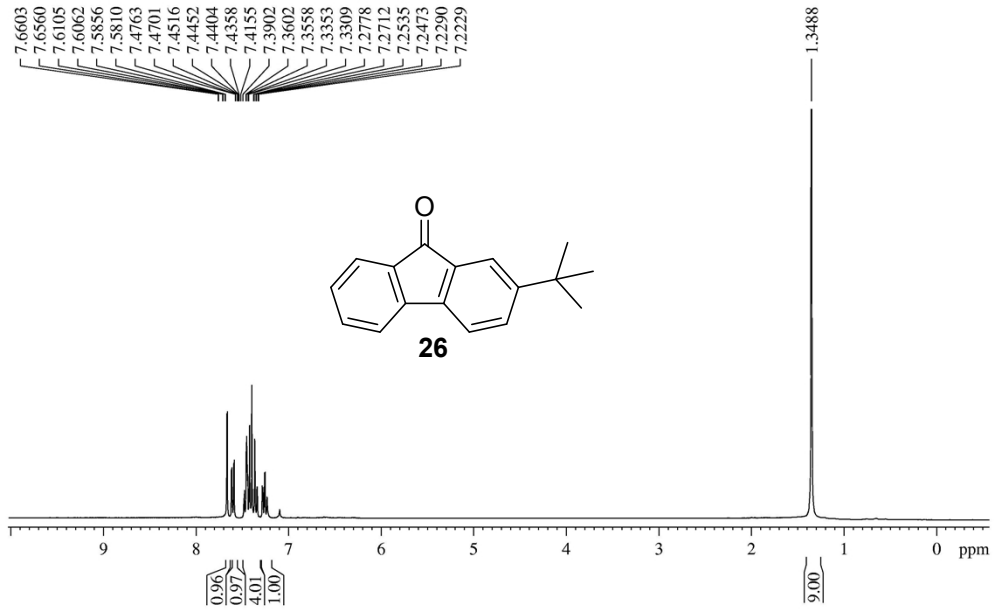

SNS-363 P

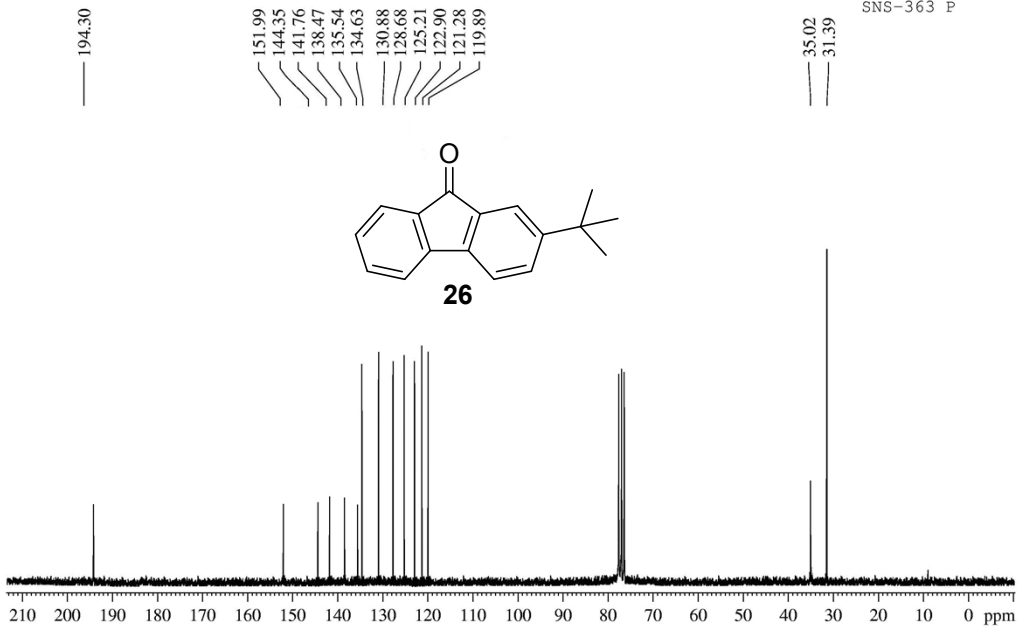

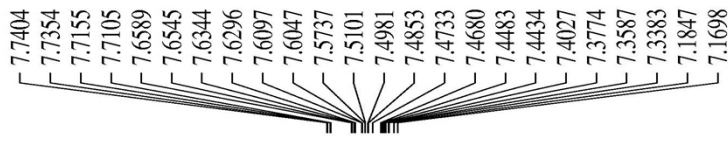

SN-TN-2

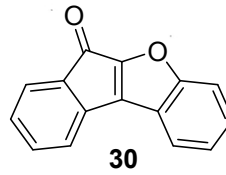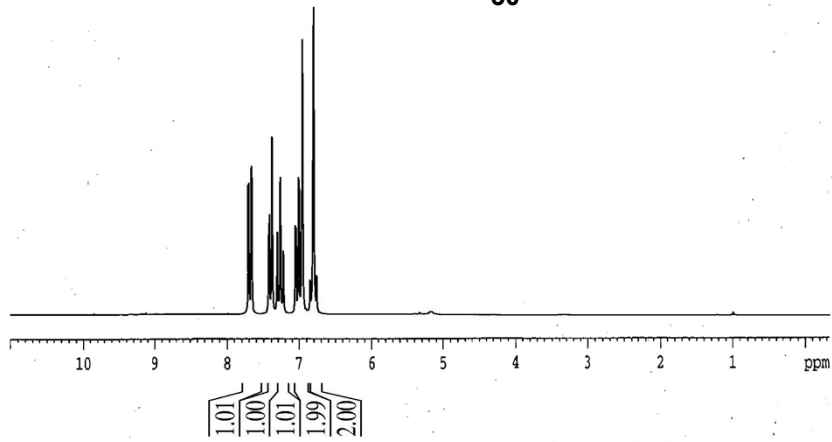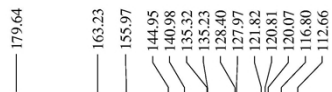

SN-TN-2

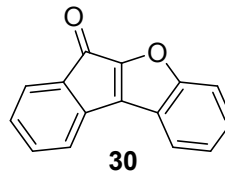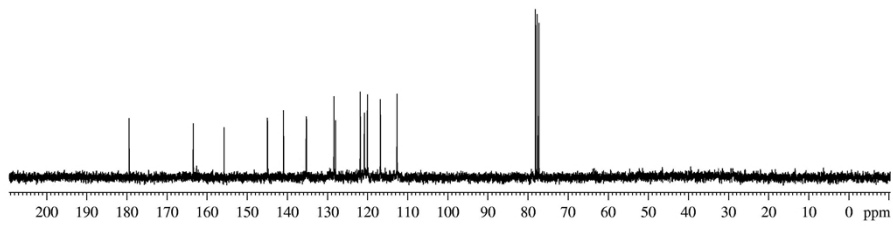

SNS -TN-1

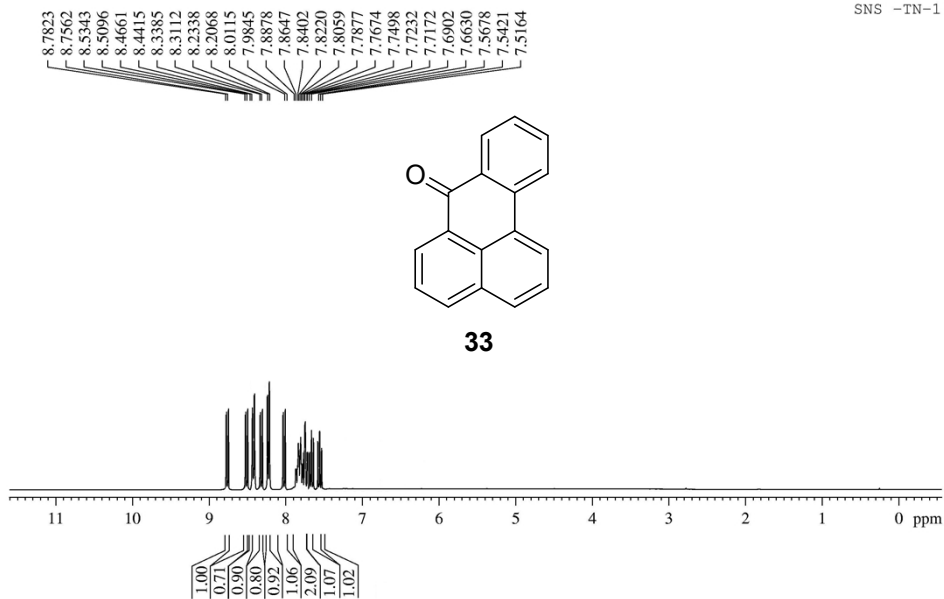

SNS-TN-1

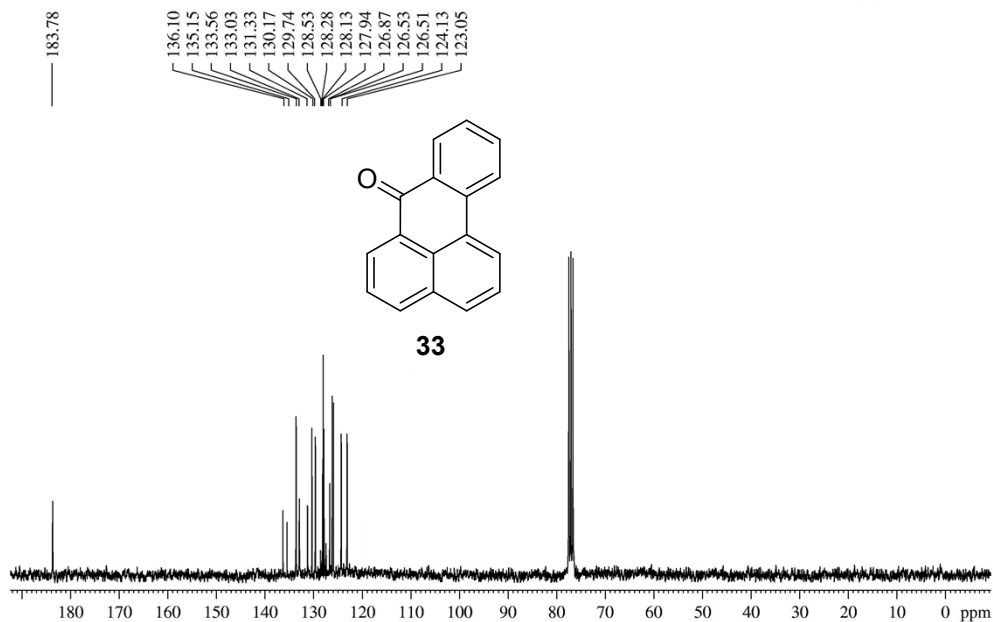

177.31  
156.40  
154.35  
136.34  
134.78  
133.41  
126.08  
125.70  
123.56  
121.94  
119.23  
118.76  
118.34

SNS-367 P  
20.79

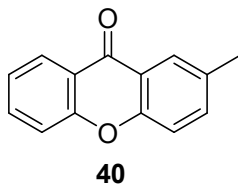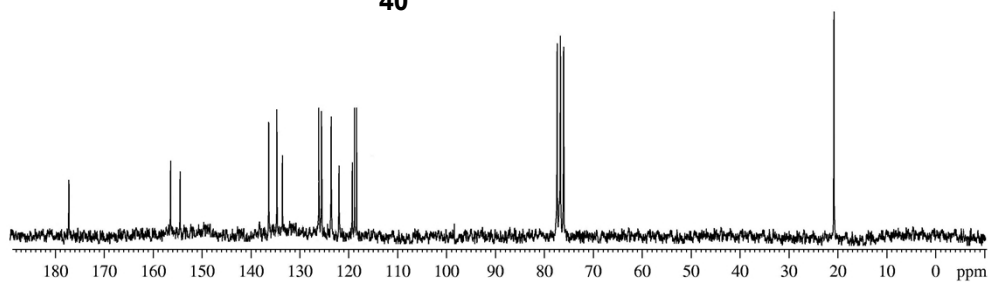

8.2835  
8.2781  
8.2573  
8.2518  
8.0539  
7.7288  
7.7102  
7.6938  
7.6828  
7.6697  
7.4937  
7.4723  
7.4461  
7.4199  
7.3889  
7.3402  
7.3144

2.4133

SNS-367P

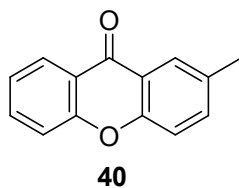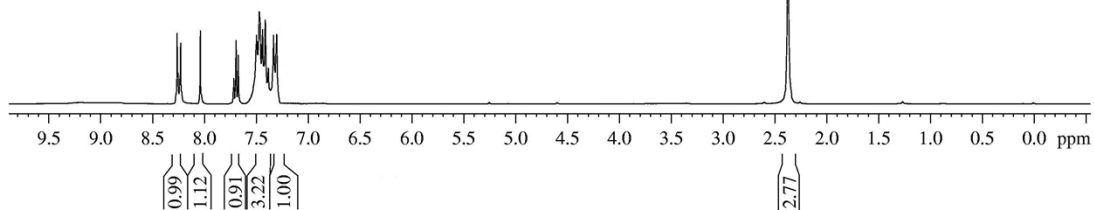

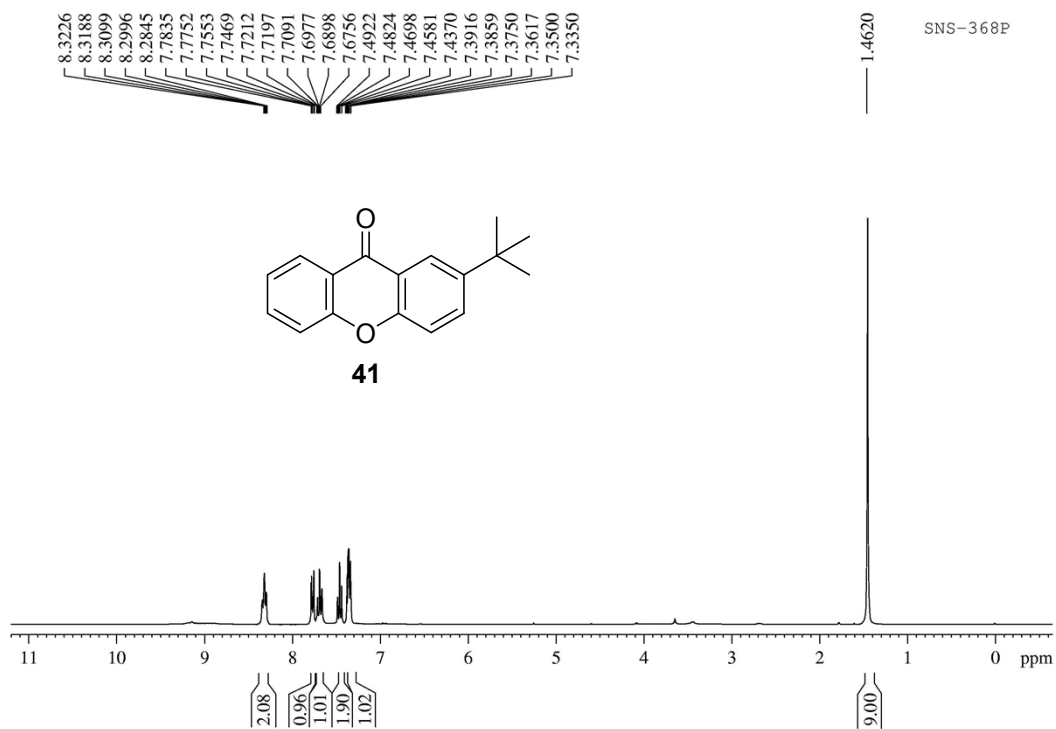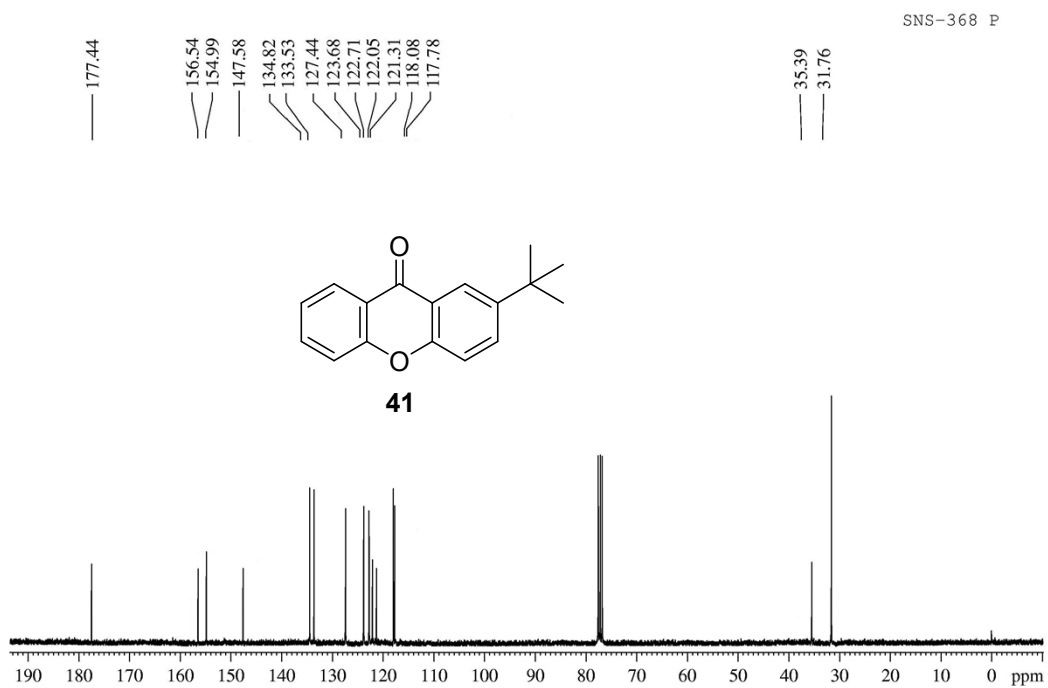



SNS-371P

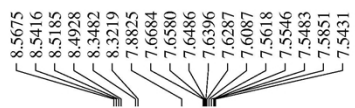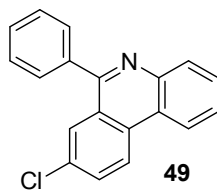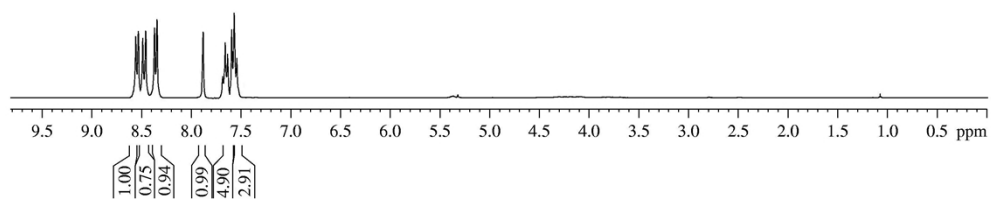

SMS-371P

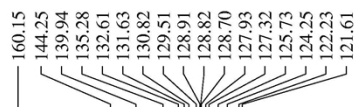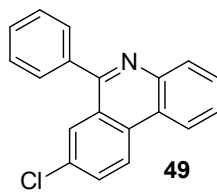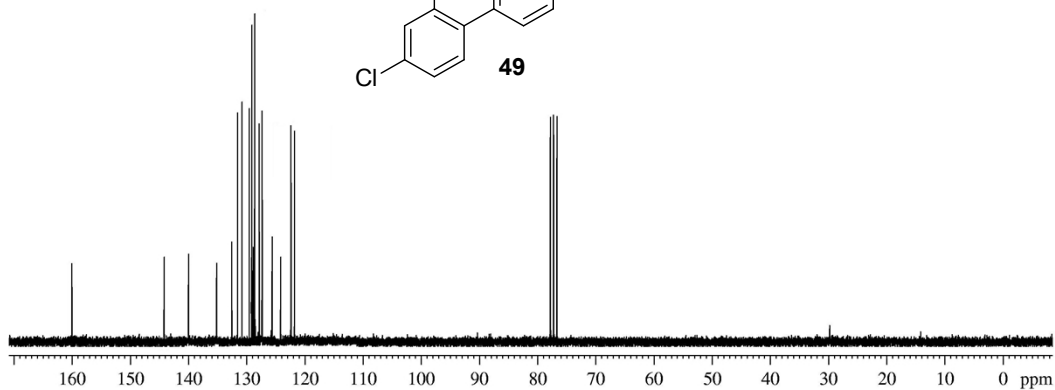

8.5926  
8.5650  
8.4948  
8.4685  
8.2439  
8.2179  
7.8736  
7.7531  
7.7493  
7.7367  
7.7260  
7.7129  
7.6999  
7.6873  
7.6737  
7.6577  
7.5963  
7.5871  
7.5783  
7.5590  
7.5464  
7.5275  
7.5193

2.5165

SNS-370P

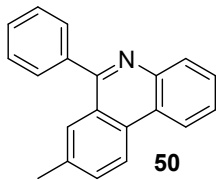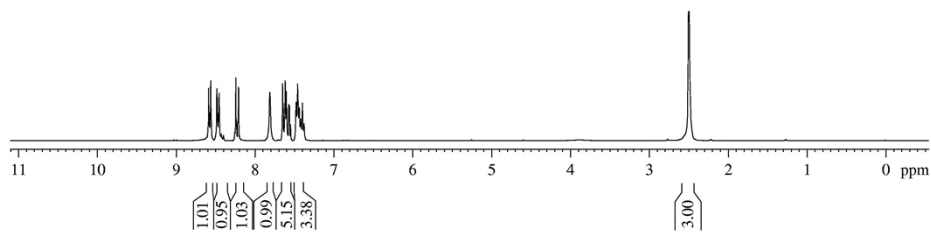

161.34  
143.78  
139.82  
137.11  
132.34  
131.21  
130.27  
129.50  
128.73  
128.54  
128.45  
128.24  
127.24  
125.37  
124.05  
122.06  
121.53

21.72

SMS-370P

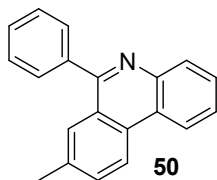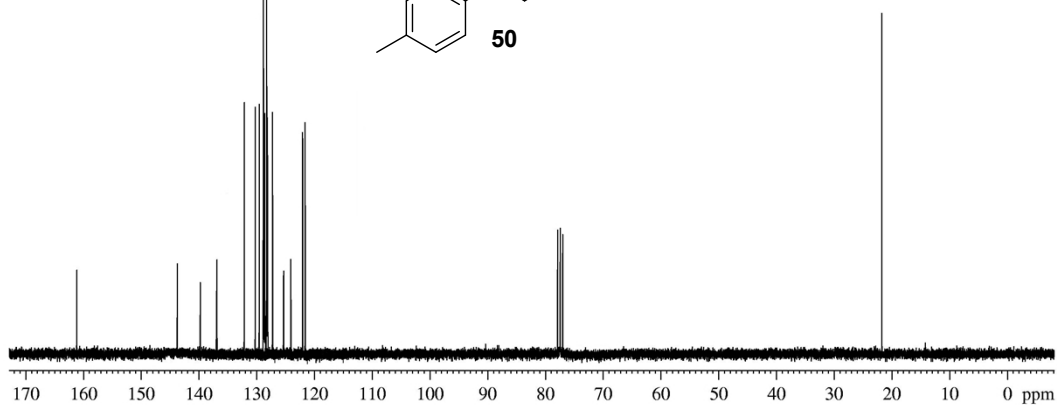

8.6537  
8.6257  
8.5640  
8.5358  
8.2935  
8.2678  
8.1250  
8.0971  
7.8608  
7.8556  
7.8465  
7.8373  
7.8235  
7.8051  
7.7874  
7.7678  
7.7461  
7.7192  
7.6891  
7.6655  
7.6346  
7.6012  
7.5861  
7.5677  
7.5579

SNS-369P

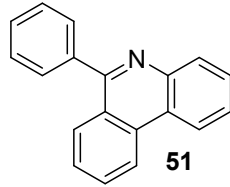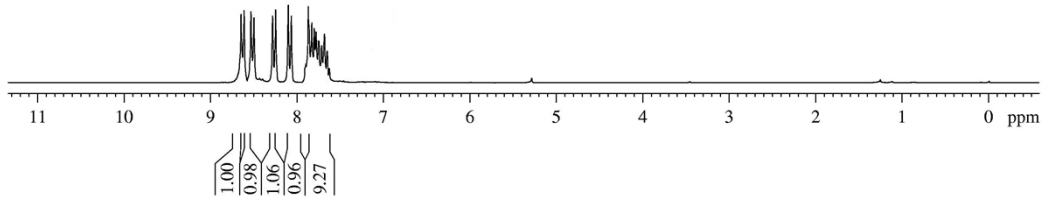

161.26  
143.74  
139.85  
133.32  
130.55  
130.21  
129.73  
128.86  
128.85  
128.71  
128.32  
127.05  
126.74  
125.21  
123.63  
122.13  
121.95

SMS-369P

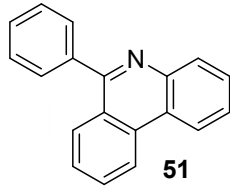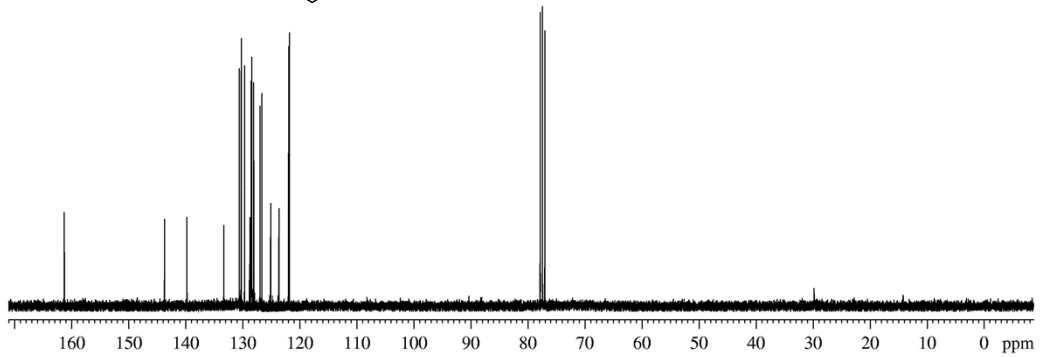

Supplement: c4ra06159d1.pdf [file c4ra06159d1.pdf]
